# Supplementary material
Source: PubMed Central journal article supplement (PMC5473214)
Supplement: 10.1074_M117.782052_jbc.M117.782052-1.pdf [file 10.1074_M117.782052_jbc.M117.782052-1.pdf]

## Supplemental Materials

### Sequential Adaptive Changes in a c-Myc-Driven Model of Hepatocellular Carcinoma

James M. Dolezal, Huabo Wang, Sucheta Kulkarni, Laura Jackson, Jie Lu, Sarangarajan Ranganathan, Eric S. Goetzman, Sivakama Bharathi, Kevin Beezhold, Craig A. Byersdorfer, Edward V. Prochownik

Correspondence to: [procev@chp.edu](mailto:procev@chp.edu)

The Supplemental Materials for the manuscript “Sequential Adaptive Changes in a c-Myc-Driven Model of Hepatocellular Carcinoma” includes:

Supplemental Figures S1 – S7

Supplemental Tables S1 – S6

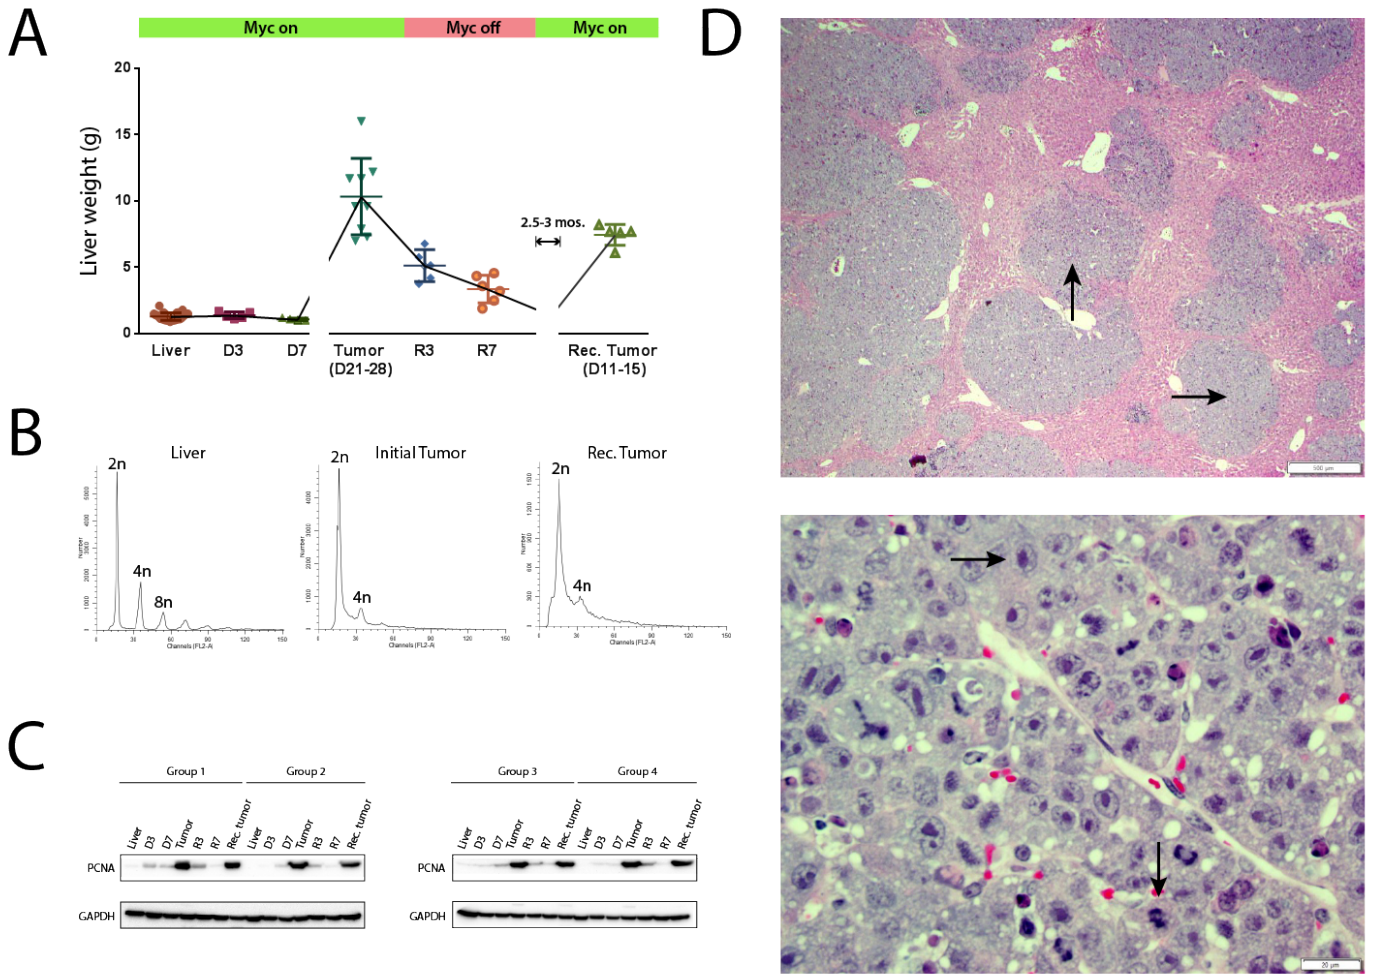

**Supplemental Figure S1. Properties of initial and recurrent HCCs.** *A*, Changes in liver weights in response to Myc de-regulation. “Liver” denotes organs used as control tissues at the beginning of the study and obtained from mice maintained continuously on doxycycline (Myc “off” state). D3 and D7 indicate the time (in days) at which livers were harvested following doxycycline removal and Myc induction (Myc “on” state). Initial tumors were harvested at 21-28 days with the remaining animals being returned to the “Myc off” state by resuming doxycycline. Regressing tumors were harvested at R3 and R7. Doxycycline was continued for 2-3 months in the remaining animals and then stopped again to generate recurrent tumors (Rec. Tumor). *B*, Typical examples of cell cycle analysis of livers and initial and recurrent tumors. Tumors demonstrated greater S phase fractions than control liver ( $P = 0.002$ ), and recurrent tumors showed a greater fraction than initial tumors ( $P = 0.001$ ). Groups were compared with ANOVA and Tukey’s multiple comparisons two-sided t-tests.  $n = 4-6$  samples/group. *C*, PCNA expression in tissues from four groups of animals. Quantification of band density can be found in Supplemental Table S6. *D*, Upper panel: Low power histologic appearance of H&E-stained HCCs. Tumor nodules (arrows) were multifocal and generally in close proximity to blood vessels. The nodules were variably sized with pleomorphic tumor cells arranged in broad trabeculae, 6-8 cells thick in many areas and often displaying an acinar/cholangiocarcinoma-like arrangement around a lumen. Nodules typically possessed distinct margins with occasional off-shoots into the surrounding liver parenchyma. The cytoplasm was amphophilic with distinct borders and vesicular nuclei containing single or multiple prominent nucleoli. Black bar = 500 microns. Lower panel: Higher power view showing frequent mitoses (arrows). The degree of pleomorphism and the cytologic features were of a moderately differentiated hepatocellular carcinoma. Black bar = 20 microns.

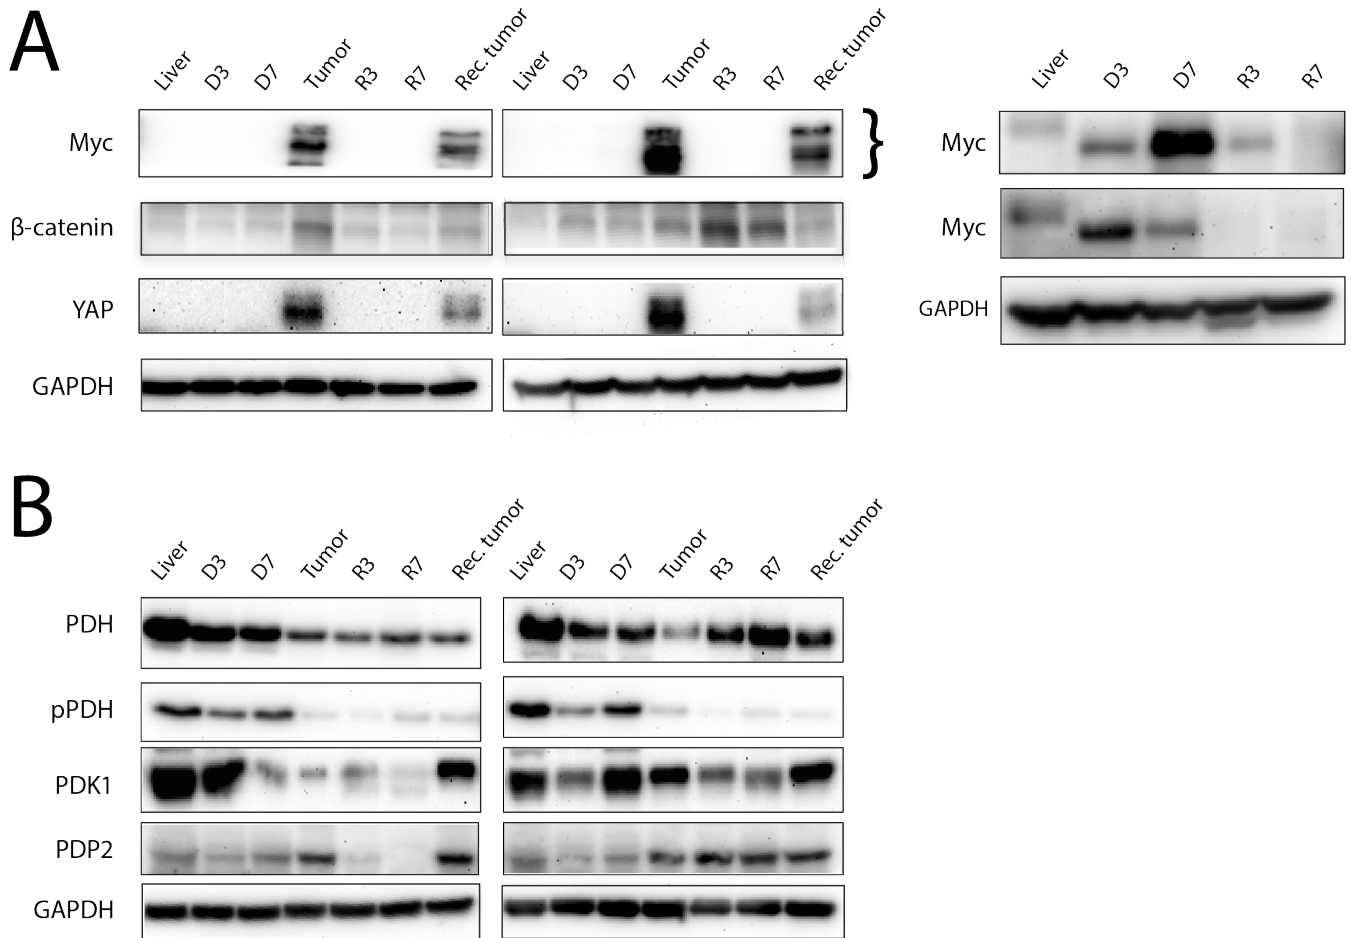

**Supplemental Figure S2. Immuno-blot profiling of liver and tumor samples.** *A*, Additional independent groups of samples similar to those depicted in Figure 1. Immuno-blots were performed for Myc,  $\beta$ -catenin and YAP. The immuno-blots for Myc on the far right are the same samples as those on the left but without tumors, to allow for a longer exposure and better visualization of Myc protein in other lanes. *B*, Additional sets of immuo-blots for PDH, pPDH, PDK1 and PDP2. Quantification of band density can be found in Supplemental Table S6.

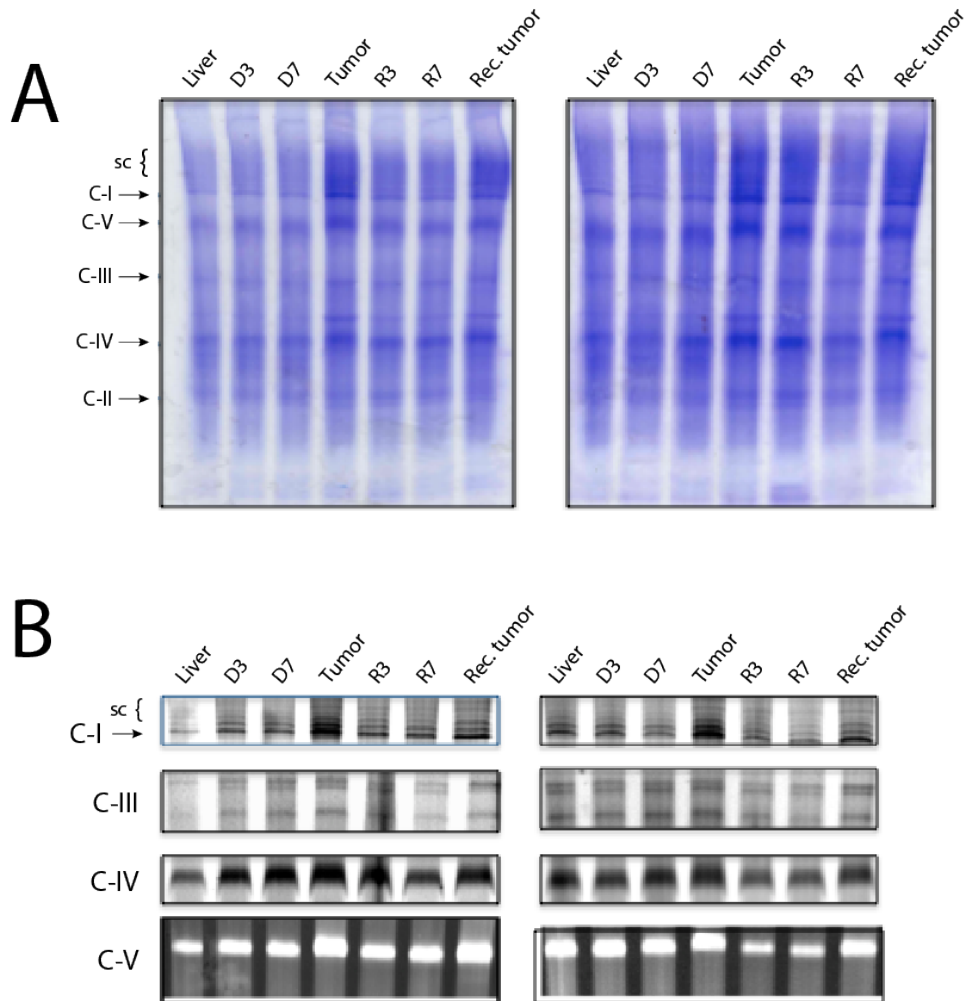

**Supplemental Figure S3. Examples of BNGE and *in situ* assays of ETC Complexes I, III, IV and V.** *A*, Typical BNGE results from two representative groups of mice. Each complex is denoted by an arrow. sc = supercomplexes comprised primarily of Complexes I, III and IV (1,2). *B*, *In situ* enzymatic assays for Complexes I, III, IV and V after normalizing to BNGE complex densities. Complex I = NADH ubiquinone oxidoreductase, Complex III = decylubiquinol cytochrome c oxidoreductase, Complex IV = cytochrome c oxidase, Complex V = ATPase (1).

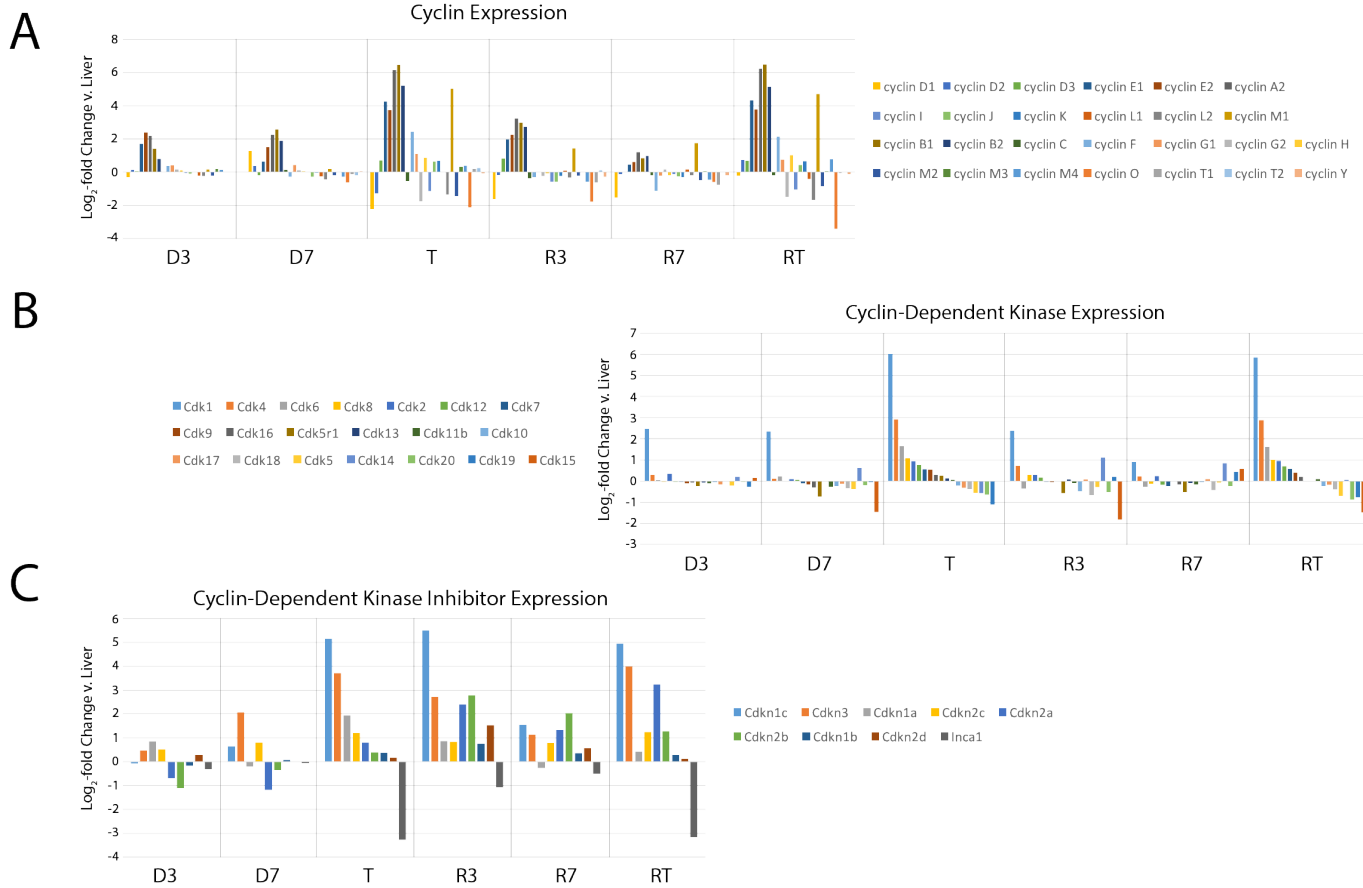

**Supplemental Figure S4. Expression of transcripts encoding cell cycle regulators. A, Cyclins. B, Cyclin-dependent kinases. C, Cyclin-dependent kinase inhibitors.**

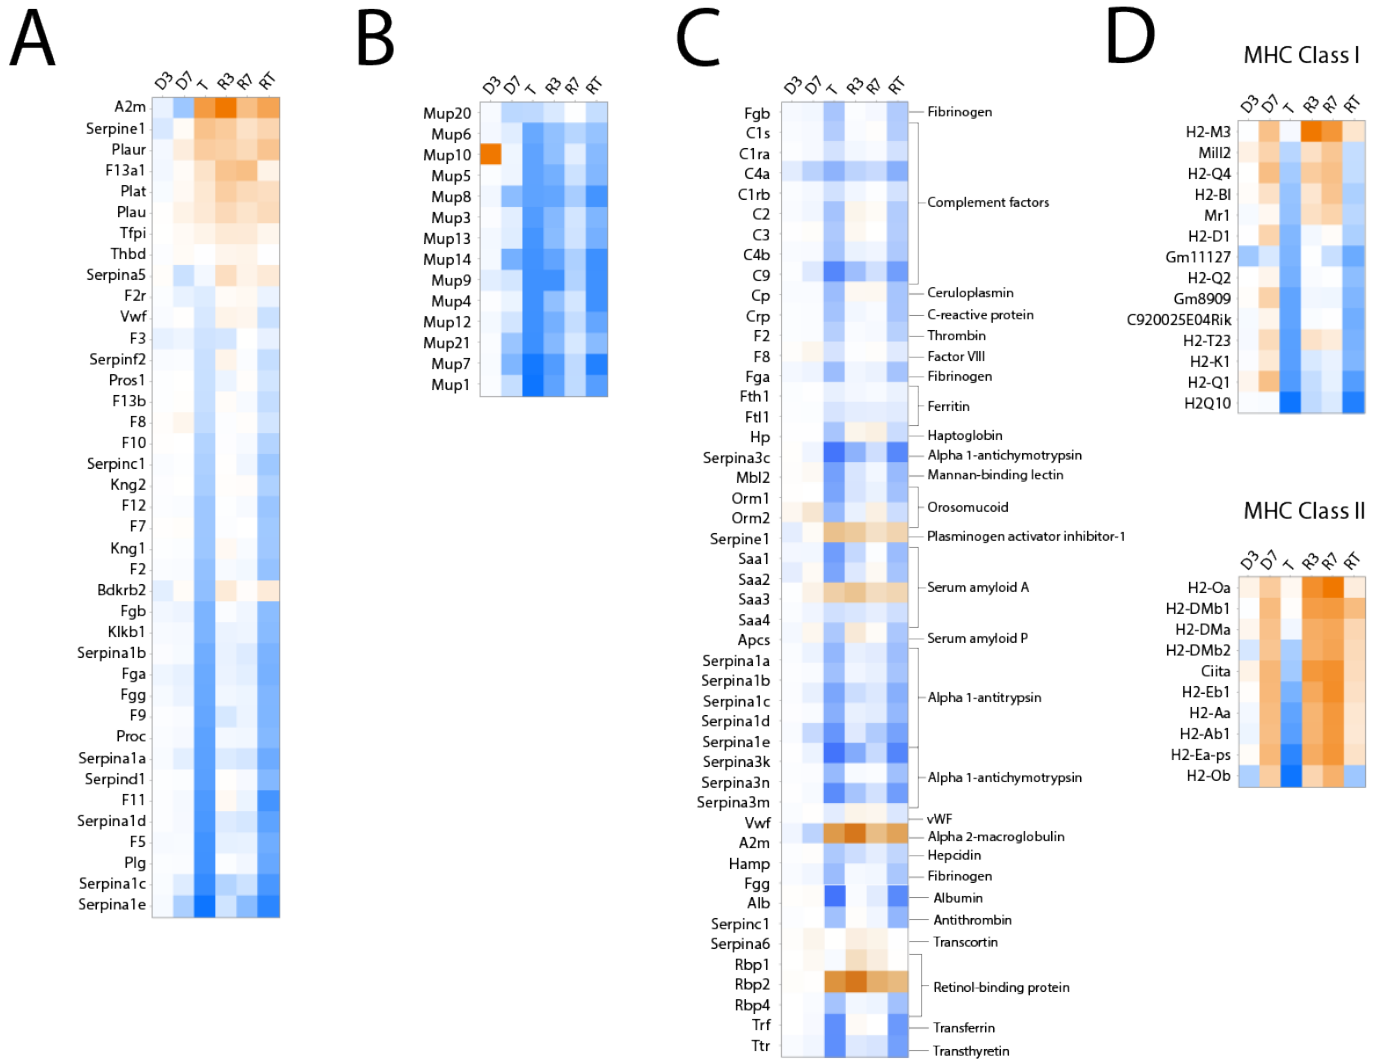

**Supplemental Figure S5. Loss of expression in tumors of select transcripts encoding proteins synthesized by mature hepatocytes.** *A*, Transcripts encoding coagulation factors. Note the marked down-regulation of hepatocyte-specific transcripts encoding most members of the intrinsic, extrinsic and common clotting pathway including those for Factors II, V, VII, VIII, IX, X, XI and XIII. Transcripts for a variety of serpin proteases that regulate the clotting cascade (3) were also down-regulated, including antithrombin III (serpin 1C), protein C inhibitor (serpin A5) and heparin II co-factor (serpin D1). *B*, Heat map of major urinary protein (MUP) transcripts. Note that most of these were already dramatically down-regulated by D7, were further down-regulated by at least 100-fold in initial tumors, began to recover by R7 and were again markedly down-regulated in recurrent tumors. *C*, Heat map of acute phase reactant transcripts. *D*, Heat map of transcripts encoding major members of the major histocompatibility complex. All expression levels were obtained from RNA-Seq data and represent the mean of 5 samples/group.

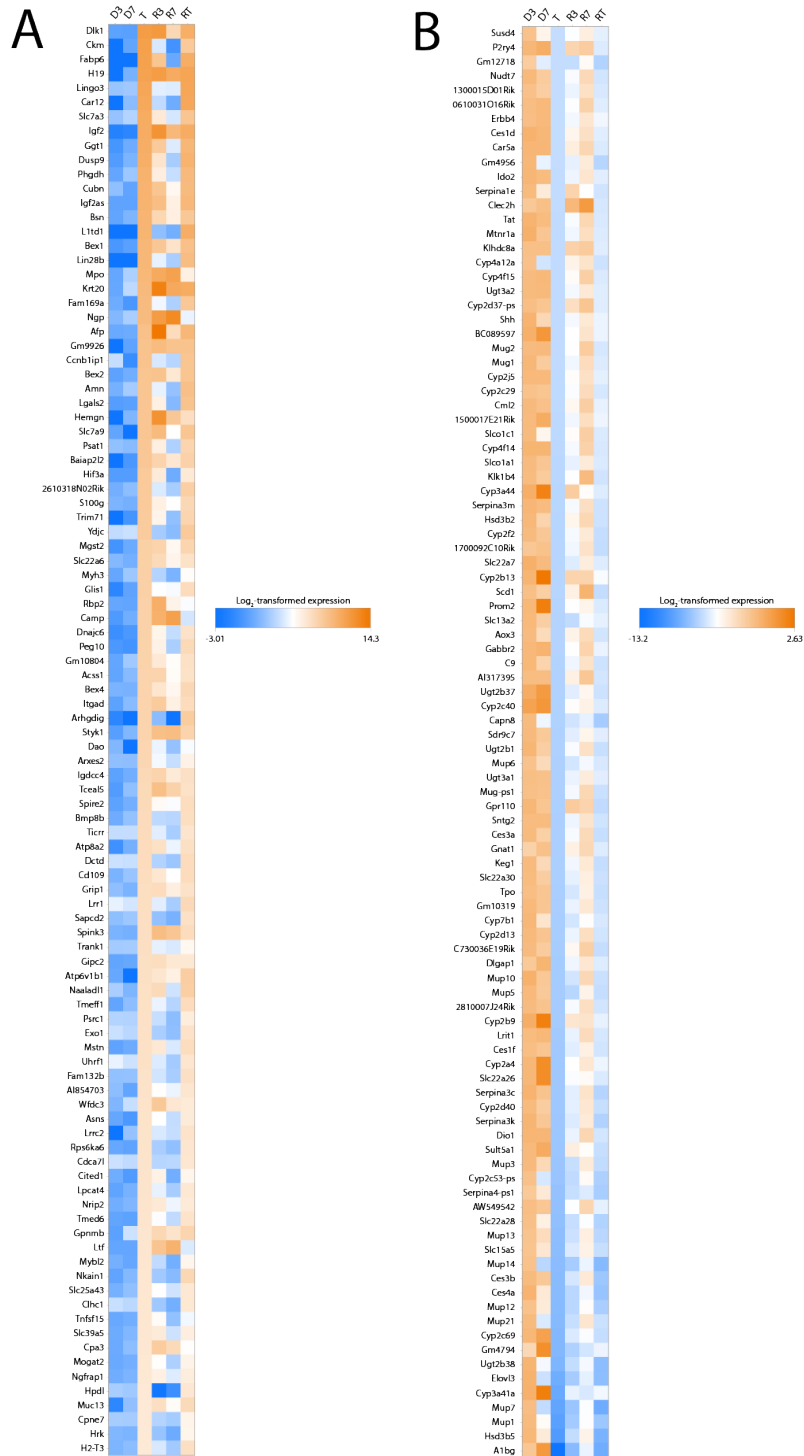

**Supplemental Figure S6. Expression of transcripts for the most highly de-regulated transcripts.** *A*, An unbiased ranking of the 100 most highly up-regulated transcripts in initial tumors versus livers. Transcripts included are those for which a signal was obtained during RNA-seq and are displayed so as to show the most abundant tumor transcripts in the group at the top and the least abundant at the bottom. Fold differences for the group ranged from 3910-144. Collectively, these transcripts were, on average, up-regulated only 67% as highly in recurrent tumors as they were in initial tumors. *B*, A similar unbiased ranking of the 100 most down-regulated transcripts in initial tumors versus liver. Fold differences ranged from 95-145,000. As with the up-regulated transcripts, the average down-regulation for the group was 76% less pronounced in recurrent tumors. See Supplementary Tables 2 and 3 for full listings and relative expression levels for all transcripts.

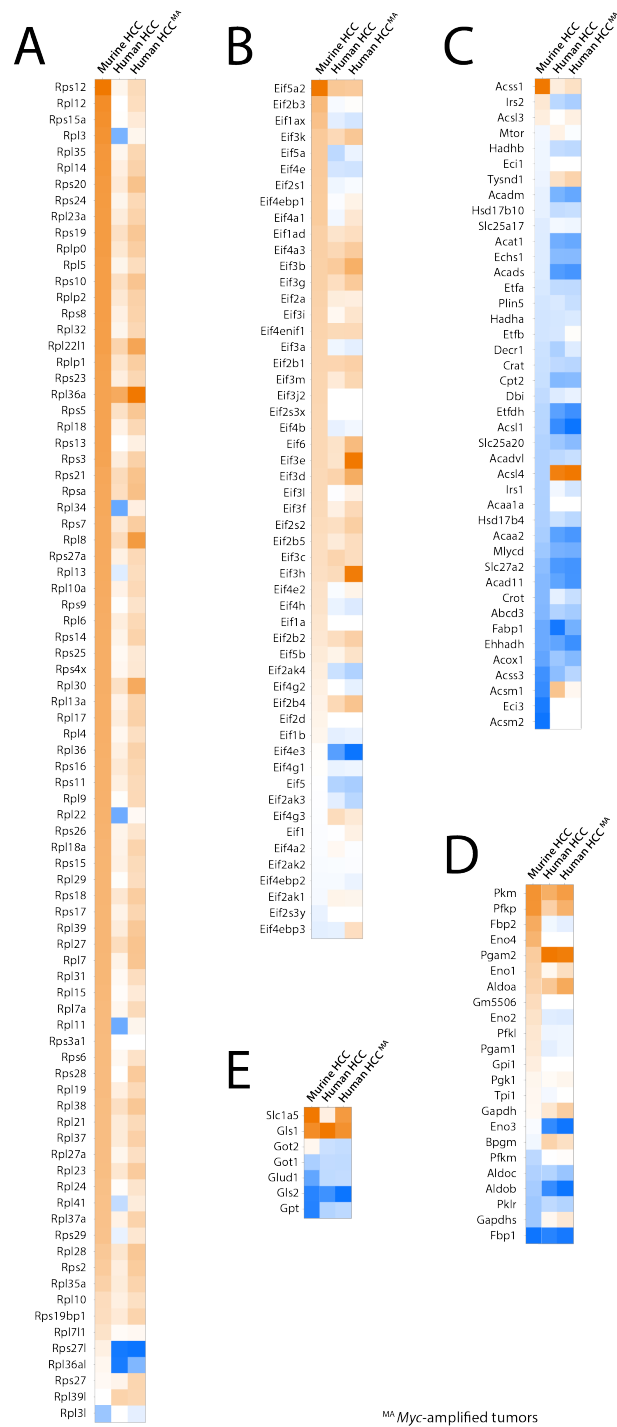

**Supplemental Figure S7. Expression of selected transcripts in human HCCs by *Myc*-amplification status.** Heatmaps represent expression levels of transcripts from Figures 5 and 6 in 65 *Myc*-amplified HCCs, 298 non-*Myc*-amplified tumors, and 50 normal livers from The Cancer Genome Atlas (TCGA). For each group of transcripts, the degree of dysregulation (absolute value of fold-change relative to normal liver) was compared between *Myc*-amplified and non-*Myc* amplified tumors with Wilcoxon signed-rank tests. Ribosomal protein (A), eIF (B), fatty acid oxidation (C), and glycolytic (D) transcripts had a significantly greater degree of dysregulation in *Myc*-amplified tumors compared to non-*Myc*-amplified tumors ( $P = <0.0001$ ,  $<0.0001$ , 0.02, and 0.003, respectively). The degree of dysregulation for glutaminolytic transcripts (E) did not significantly differ between the tumor groups.



| <b>Antibody</b>          | <b>Species</b> | <b>Vendor/ID</b>              | <b>Dilution</b> |
|--------------------------|----------------|-------------------------------|-----------------|
| Myc                      | Rabbit         | Cell Signaling (13987)        | 1:1000          |
| $\beta$ -cat             | Mouse          | Fisher Scientific (BDB610154) | 1:1000          |
| Yap                      | Rabbit         | Cell Signaling (4912)         | 1:1000          |
| GAPDH                    | Mouse          | Sigma-Aldrich (G8795)         | 1:20000         |
| PDH                      | Mouse          | Santa Cruz (SC-377092)        | 1:1000          |
| pPDH                     | Rabbit         | Calbiochem (ap1062)           | 1:2000          |
| PDK1                     | Rabbit         | Cell Signaling (3820)         | 1:1000          |
| PDP2                     | Rabbit         | BioVision (3944)              | 1:500           |
| GLS-2                    | Rabbit         | Abcam (ab113509)              | 1:1000          |
| GluDH1                   | Rabbit         | Cell Signaling (12793)        | 1:1000          |
| CD45.2                   | Mouse          | eBiosciences(17-0454)         | 1:200           |
| CD11b (M1/70)            | Rat            | eBiosciences(45-0112)         | 1:200           |
| Ly6G (RB6-8C5)           | Rat            | eBiosciences(13-5931)         | 1:200           |
| CD68 (FA-11)             | Rat            | eBiosciences(25-0681)         | 1:200           |
| MHC class II (AF6-120.1) | Mouse          | eBiosciences(12-5320)         | 1:200           |
| TCR- $\beta$ (H57-597)   | Hamster        | eBiosciences(45-5961)         | 1:200           |
| B220 (RA3-6B2)           | Rat            | BD Biosciences(553088)        | 1:200           |
| CD4 (RM4-5)              | Rat            | BD Biosciences(553049)        | 1:200           |
| CD8 (53-6.7)             | Rat            | eBiosciences(47-0081)         | 1:200           |
| Ly6c (HK1.4)             | Mouse          | eBiosciences(53-5932)         | 1:200           |
| Live/Dead dye            | N/A            | ThermoFisher(L34957)          | 1:1000          |
| PCNA                     | Mouse          | Santa Cruz (SC-56)            | 1:500           |

**Supplemental Table S1.** Antibodies used for the current studies.

| GenBank ID | Gene          | T v L<br>log <sub>2</sub> (Δ) | RT v L<br>log <sub>2</sub> (Δ) | GenBank ID | Gene     | T v L<br>log <sub>2</sub> (Δ) | RT v L<br>log <sub>2</sub> (Δ) |
|------------|---------------|-------------------------------|--------------------------------|------------|----------|-------------------------------|--------------------------------|
| 13386      | Dlk1          | 11.93                         | 10.82                          | 13142      | Dao      | 8.30                          | 5.40                           |
| 12715      | Ckm           | 11.71                         | 9.06                           | 76976      | Arxes2   | 8.27                          | 6.51                           |
| 16204      | Fabp6         | 11.65                         | 10.90                          | 56741      | Igdcc4   | 8.10                          | 7.63                           |
| 14955      | H19           | 11.58                         | 11.45                          | 331532     | Tceal5   | 8.07                          | 7.55                           |
| 237403     | Lingo3        | 11.35                         | 11.34                          | 234857     | Spire2   | 8.03                          | 7.85                           |
| 76459      | Car12         | 11.22                         | 11.28                          | 12164      | Bmp8b    | 7.98                          | 7.75                           |
| 11989      | Slc7a3        | 11.00                         | 9.38                           | 77011      | Ticrr    | 7.95                          | 7.36                           |
| 16002      | Igf2          | 10.96                         | 10.94                          | 50769      | Atp8a2   | 7.92                          | 7.64                           |
| 14598      | Ggt1          | 10.85                         | 10.25                          | 320685     | Dctd     | 7.90                          | 7.93                           |
| 75590      | Dusp9         | 10.82                         | 10.55                          | 235505     | Cd109    | 7.84                          | 7.89                           |
| 236539     | Phgdh         | 10.61                         | 10.09                          | 74053      | Grip1    | 7.80                          | 7.53                           |
| 65969      | Cubn          | 10.54                         | 10.01                          | 69706      | Lrr1     | 7.79                          | 8.07                           |
| 111975     | Igf2as        | 10.51                         | 10.20                          | 72080      | Sapcd2   | 7.74                          | 7.57                           |
| 12217      | Bsn           | 10.44                         | 9.18                           | 20730      | Spink3   | 7.72                          | 7.89                           |
| 381591     | L1td1         | 10.42                         | 10.83                          | 320429     | Trank1   | 7.71                          | 6.13                           |
| 19716      | Bex1          | 10.28                         | 9.65                           | 54120      | Gipc2    | 7.65                          | 7.13                           |
| 380669     | Lin28b        | 10.26                         | 9.90                           | 110935     | Atp6v1b1 | 7.65                          | 8.81                           |
| 17523      | Mpo           | 10.21                         | 6.59                           | 381204     | Naaladl1 | 7.62                          | 8.75                           |
| 66809      | Krt20         | 10.11                         | 11.01                          | 230157     | Tmeff1   | 7.61                          | 7.92                           |
| 320557     | Fam169a       | 10.01                         | 9.21                           | 56742      | Psrl1    | 7.60                          | 6.82                           |
| 18054      | Ngp           | 10.00                         | 4.90                           | 26909      | Exo1     | 7.60                          | 7.53                           |
| 11576      | Afp           | 9.65                          | 10.28                          | 17700      | Mstn     | 7.59                          | 7.87                           |
| 100503565  | Gm9926        | 9.52                          | 9.50                           | 18140      | Uhrf1    | 7.57                          | 7.26                           |
| 239083     | Ccnb1ip1      | 9.51                          | 9.39                           | 227358     | Fam132b  | 7.52                          | 7.63                           |
| 12069      | Bex2          | 9.40                          | 9.41                           | 243373     | AI854703 | 7.50                          | 7.30                           |
| 93835      | Amn           | 9.38                          | 9.70                           | 71856      | Wfdc3    | 7.45                          | 7.00                           |
| 107753     | Lgals2        | 9.32                          | 9.52                           | 27053      | Asns     | 7.44                          | 6.92                           |
| 93966      | Hemgn         | 9.32                          | 7.70                           | 74249      | Lrrc2    | 7.42                          | 7.47                           |
| 30962      | Slc7a9        | 9.31                          | 9.38                           | 67071      | Rps6ka6  | 7.42                          | 7.26                           |
| 107272     | Psat1         | 9.25                          | 8.37                           | 217946     | Cdca71   | 7.40                          | 7.24                           |
| 207495     | Baiap2l2      | 9.24                          | 8.62                           | 12705      | Cited1   | 7.38                          | 6.27                           |
| 53417      | Hif3a         | 9.09                          | 7.04                           | 99010      | Lpcat4   | 7.38                          | 7.14                           |
| 70458      | 2610318N02Rik | 9.08                          | 8.73                           | 60345      | Nrip2    | 7.37                          | 7.02                           |
| 12309      | S100g         | 9.05                          | 8.18                           | 66269      | Tmed6    | 7.35                          | 7.44                           |
| 636931     | Trim71        | 9.02                          | 8.37                           | 93695      | GpnmB    | 7.30                          | 8.37                           |
| 69101      | Ydjc          | 8.97                          | 9.04                           | 17002      | Ltf      | 7.25                          | 4.33                           |
| 211666     | Mgst2         | 8.70                          | 8.37                           | 17865      | Mybl2    | 7.25                          | 6.30                           |
| 18399      | Slc22a6       | 8.69                          | 7.55                           | 67149      | Nkain1   | 7.21                          | 8.19                           |
| 17883      | Myh3          | 8.67                          | 5.83                           | 194744     | Slc25a43 | 7.21                          | 7.16                           |
| 230587     | Glis1         | 8.63                          | 7.94                           | 69885      | Clhc1    | 7.20                          | 7.17                           |
| 19660      | Rbp2          | 8.61                          | 5.47                           | 326623     | Tnfrsf15 | 7.20                          | 5.20                           |
| 12796      | Camp          | 8.60                          | 4.11                           | 72002      | Slc39a5  | 7.19                          | 6.73                           |
| 72685      | Dnajc6        | 8.55                          | 7.51                           | 12873      | Cpa3     | 7.18                          | 5.76                           |
| 170676     | Peg10         | 8.52                          | 8.06                           | 233549     | Mogat2   | 7.12                          | 6.42                           |
| 100038525  | Gm10804       | 8.51                          | 7.56                           | 12070      | Ngfrap1  | 7.11                          | 6.82                           |
| 68738      | Acss1         | 8.48                          | 7.56                           | 242642     | Hpd1     | 7.09                          | 7.19                           |
| 406217     | Bex4          | 8.47                          | 8.16                           | 17063      | Muc13    | 7.06                          | 8.04                           |
| 381924     | Itgad         | 8.44                          | 7.93                           | 102278     | Cpne7    | 7.05                          | 6.37                           |
| 14570      | Arhgdig       | 8.44                          | 8.90                           | 12123      | Hrk      | 7.04                          | 6.34                           |
| 243659     | Styk1         | 8.44                          | 8.45                           | 15043      | H2-T3    | 7.04                          | 7.67                           |

**Supplemental Table S2.** Top 100 most highly up-regulated transcripts in initial and recurrent tumors.

| GenBank ID | Gene          | T v L<br>log <sub>2</sub> (Δ) | RT v L<br>log <sub>2</sub> (Δ) | GenBank ID | Gene          | T v L<br>log <sub>2</sub> (Δ) | RT v L<br>log <sub>2</sub> (Δ) |
|------------|---------------|-------------------------------|--------------------------------|------------|---------------|-------------------------------|--------------------------------|
| 96935      | Susd4         | -6.57                         | -4.67                          | 71773      | Ugt2b1        | -7.80                         | -6.31                          |
| 57385      | P2ry4         | -6.58                         | -5.16                          | 620807     | Mup6          | -7.88                         | -5.48                          |
| 622167     | Gm12718       | -6.59                         | -7.60                          | 105887     | Ugt3a1        | -7.89                         | -4.86                          |
| 67528      | Nudt7         | -6.59                         | -5.74                          | 17835      | Mug-ps1       | -7.90                         | -6.27                          |
| 74161      | 1300015D01Rik | -6.59                         | -5.46                          | 77596      | Gpr110        | -7.94                         | -6.81                          |
| 68369      | 0610031O16Rik | -6.60                         | -4.97                          | 268534     | Sntg2         | -7.95                         | -5.91                          |
| 13869      | Erbb4         | -6.61                         | -3.92                          | 382053     | Ces3a         | -7.95                         | -6.38                          |
| 104158     | Ces1d         | -6.62                         | -4.90                          | 14685      | Gnat1         | -8.01                         | -5.08                          |
| 12352      | Car5a         | -6.62                         | -5.28                          | 64697      | Keg1          | -8.02                         | -6.52                          |
| 241041     | Gm4956        | -6.63                         | -7.32                          | 319800     | Slc22a30      | -8.03                         | -6.14                          |
| 209176     | Ido2          | -6.66                         | -4.84                          | 22018      | Tpo           | -8.08                         | -6.40                          |
| 20704      | Serpina1e     | -6.67                         | -5.83                          | 381806     | Gm10319       | -8.13                         | -6.12                          |
| 94071      | Clec2h        | -6.73                         | -5.50                          | 13123      | Cyp7b1        | -8.15                         | -5.46                          |
| 234724     | Tat           | -6.74                         | -5.38                          | 68444      | Cyp2d13       | -8.18                         | -5.81                          |
| 17773      | Mtnr1a        | -6.77                         | -5.15                          | 402734     | C730036E19Rik | -8.22                         | -6.50                          |
| 213417     | Klhdc8a       | -6.79                         | -5.01                          | 224997     | Dlgap1        | -8.33                         | -5.07                          |
| 277753     | Cyp4a12a      | -6.79                         | -6.04                          | 100039008  | Mup10         | -8.35                         | -6.27                          |
| 106648     | Cyp4f15       | -6.79                         | -5.26                          | 17844      | Mup5          | -8.35                         | -6.52                          |
| 223337     | Ugt3a2        | -6.80                         | -4.93                          | 76971      | 2810007J24Rik | -8.35                         | -5.81                          |
| 627860     | Cyp2d37-ps    | -6.80                         | -4.97                          | 13094      | Cyp2b9        | -8.36                         | -4.48                          |
| 20423      | Shh           | -6.81                         | -4.27                          | 239037     | Lrit1         | -8.47                         | -5.51                          |
| 216454     | BC089597      | -6.82                         | -4.28                          | 234564     | Ces1f         | -8.57                         | -5.78                          |
| 17837      | Mug2          | -6.82                         | -5.51                          | 13086      | Cyp2a4        | -8.62                         | -4.18                          |
| 17836      | Mug1          | -6.82                         | -5.13                          | 236149     | Slc22a26      | -8.67                         | -5.21                          |
| 13109      | Cyp2j5        | -6.87                         | -4.65                          | 16625      | Serpina3c     | -8.71                         | -7.45                          |
| 13095      | Cyp2c29       | -6.88                         | -5.51                          | 71754      | Cyp2d40       | -8.74                         | -6.41                          |
| 93673      | Cml2          | -6.90                         | -4.54                          | 20714      | Serpina3k     | -8.78                         | -7.66                          |
| 668215     | 1500017E21Rik | -6.98                         | -4.17                          | 13370      | Dio1          | -8.85                         | -5.72                          |
| 58807      | Slco1c1       | -7.03                         | -5.30                          | 57429      | Sult5a1       | -8.88                         | -6.40                          |
| 64385      | Cyp4f14       | -7.04                         | -5.45                          | 17842      | Mup3          | -9.01                         | -6.66                          |
| 28248      | Slco1a1       | -7.13                         | -5.29                          | 638988     | Cyp2c53-ps    | -9.06                         | -7.86                          |
| 18048      | Klk1b4        | -7.18                         | -5.89                          | 321018     | Serpina4-ps1  | -9.28                         | -8.16                          |
| 337924     | Cyp3a44       | -7.23                         | -5.08                          | 100993     | AW549542      | -9.37                         | -4.59                          |
| 20717      | Serpina3m     | -7.23                         | -6.12                          | 434674     | Slc22a28      | -9.53                         | -7.64                          |
| 15493      | Hsd3b2        | -7.31                         | -6.08                          | 100039089  | Mup13         | -9.69                         | -7.16                          |
| 13107      | Cyp2f2        | -7.32                         | -6.53                          | 277898     | Slc15a5       | -9.79                         | -6.42                          |
| 73554      | 1700092C10Rik | -7.34                         | -6.62                          | 100039116  | Mup14         | -9.93                         | -10.14                         |
| 108114     | Slc22a7       | -7.34                         | -5.08                          | 13909      | Ces3b         | -9.95                         | -8.83                          |
| 13089      | Cyp2b13       | -7.35                         | -3.49                          | 234677     | Ces4a         | -9.95                         | -9.17                          |
| 20249      | Scd1          | -7.36                         | -6.57                          | 100039054  | Mup12         | -10.06                        | -8.09                          |
| 192212     | Prom2         | -7.45                         | -5.21                          | 381531     | Mup21         | -10.16                        | -6.20                          |
| 20500      | Slc13a2       | -7.48                         | -4.59                          | 100043108  | Cyp2c69       | -10.32                        | -6.49                          |
| 71724      | Aox3          | -7.49                         | -5.80                          | 215895     | Gm4794        | -10.33                        | -4.22                          |
| 242425     | Gabbr2        | -7.49                         | -4.39                          | 100559     | Ugt2b38       | -10.60                        | -9.77                          |
| 12279      | C9            | -7.56                         | -6.07                          | 12686      | Elov13        | -11.44                        | -9.76                          |
| 215929     | A1317395      | -7.65                         | -5.70                          | 53973      | Cyp3a41a      | -11.83                        | -3.89                          |
| 112417     | Ugt2b37       | -7.67                         | -6.04                          | 100041658  | Mup7          | -12.28                        | -11.55                         |
| 13099      | Cyp2c40       | -7.70                         | -5.13                          | 17840      | Mup1          | -12.66                        | -8.84                          |
| 170725     | Capn8         | -7.70                         | -8.30                          | 15496      | Hsd3b5        | -13.22                        | -10.87                         |
| 70061      | Sdr9c7        | -7.75                         | -4.84                          | 117586     | Albg          | -17.15                        | -11.42                         |

**Supplemental Table S3.** Top 100 most highly down-regulated transcripts in initial and recurrent tumors.

| Gene    | GenBank ID | Description                                                     | Initial Tumor Expression v Liver | Recurrent Tumor Expression v Liver |
|---------|------------|-----------------------------------------------------------------|----------------------------------|------------------------------------|
| Igf1    | 16000      | insulin-like growth factor 1                                    | 0.04                             | 0.04                               |
| Igf2    | 16002      | insulin-like growth factor 2                                    | 1994.25                          | 1961.65                            |
| Igfbp1  | 16006      | insulin-like growth factor binding protein 1                    | 20.03                            | 4.81                               |
| Igfbp2  | 16008      | insulin-like growth factor binding protein 2                    | 0.60                             | 0.60                               |
| Igfbp3  | 16009      | insulin-like growth factor binding protein 3                    | 0.82                             | 0.55                               |
| Igfbp4  | 16010      | insulin-like growth factor binding protein 4                    | 0.29                             | 0.25                               |
| Igfbp5  | 16011      | insulin-like growth factor binding protein 5                    | 0.21                             | 0.74                               |
| Igfbp6  | 16012      | insulin-like growth factor binding protein 6                    | 0.12                             | 0.26                               |
| Igfbp7  | 29817      | insulin-like growth factor binding protein 7                    | 0.54                             | 0.62                               |
| Igf2bp1 | 140486     | insulin-like growth factor 2 mRNA binding protein 1             | 67.36                            | 676.74                             |
| Igf2bp2 | 319765     | insulin-like growth factor 2 mRNA binding protein 2             | 0.21                             | 0.52                               |
| Igf2bp3 | 140488     | insulin-like growth factor 2 mRNA binding protein 3             | 23.11                            | 15.71                              |
| Igf1r   | 16001      | insulin-like growth factor 1 receptor                           | 0.69                             | 2.12                               |
| Igf2r   | 16004      | insulin-like growth factor 2 receptor                           | 2.55                             | 2.49                               |
| Igfals  | 16005      | insulin-like growth factor binding protein, acid labile subunit | 0.01                             | 0.03                               |
| Insr    | 16337      | insulin receptor                                                | 0.54                             | 0.47                               |
| H19     | 14955      | H19 fetal liver mRNA                                            | 3053.89                          | 2794.88                            |
| Lin28b  | 380669     | lin-28 homolog B (C. elegans)                                   | 1224.71                          | 955.17                             |

**Supplemental Table S4.** Relative expression of insulin-like growth factor-related transcripts in HCCs.

| Target | Forward Primer                | Reverse Primer                | Annealing Temp |
|--------|-------------------------------|-------------------------------|----------------|
| RAB27A | 5'-TCGGATGGAGATTACGATTACCT-3' | 5'-TTTTCCCTGAAATCAATGCCCA-3'  | 57 °C          |
| ADAM19 | 5'-TCAGTGGCGGACTTCAGAAAG-3'   | 5'-GCAAAAAGGTGCTCGTTCTTC-3'   | 57 °C          |
| H2DMB1 | 5'-ACCCACAGGACTTCACATAC-3'    | 5'-GGATACAGCACCCCAAATTCA-3'   | 57 °C          |
| SFXN3  | 5'-CAGGAAGACTCCGACTGTGG-3'    | 5'-CCGCTGCGATTAGAGTAATTCAC-3' | 57 °C          |
| BOK    | 5'-AGGTAGTGTCCCTGTATTCCG-3'   | 5'-AAGGTCTTGCGTACAACTCC-3'    | 57 °C          |
| NPNT   | 5'-GAAGCCTCGGCCCTGTAAG-3'     | 5'-AGCATGTATCCGTTGAGACAGTA-3' | 57 °C          |
| DHTKD1 | 5'-GCTGCTGCGGTTTATTGGTG-3'    | 5'-CAAGGCAAGTGTCTCTGCG-3'     | 60 °C          |

**Supplemental Table S5.** Primer sequences for qRT-PCR confirmation.

| Target                           | Liver | D3   | D7   | Tumor | R3   | R7   | Rec. tumor |
|----------------------------------|-------|------|------|-------|------|------|------------|
| <b>Figure 1</b>                  |       |      |      |       |      |      |            |
| Myc (short exposure)             | 0     | 0    | 0    | 1.0   | 0    | 0    | 0.83       |
| $\beta$ -catenin                 | 1.0   | 2.9  | 2.5  | 3.3   | 3.9  | 2.4  | 2.3        |
| YAP                              | 0     | 0    | 0    | 1.0   | 0    | 0    | 0.56       |
| GAPDH (A, short exposure)        | 1.0   | 1.1  | 0.92 | 1.1   | 1.1  | 1.1  | 0.98       |
| Myc (long exposure)              | 0     | 1.0  | 0.57 | -     | 0    | 0    | -          |
| GAPDH (A, long exposure)         | 1.0   | 1.2  | 1.0  | -     | 1.5  | 1.9  | -          |
| PDH                              | 1.0   | 0.67 | 0.79 | 0.66  | 0.53 | 0.76 | 0.27       |
| pPDH                             | 1.0   | 1.4  | 1.1  | 0.22  | 0.27 | 0.44 | 0.26       |
| PDK1                             | 1.0   | 0.97 | 0.86 | 0.52  | 0.12 | 0.02 | 0.54       |
| PDP2                             | 1.0   | 2.0  | 1.7  | 2.0   | 1.5  | 1.1  | 1.8        |
| GAPDH (C)                        | 1.0   | 0.80 | 1.0  | 0.97  | 1.0  | 0.97 | 0.96       |
| <b>Figure 5</b>                  |       |      |      |       |      |      |            |
| GLS1 (Set 1)                     | 0     | 0    | 0.25 | 1.0   | 0.38 | 0.30 | 1.5        |
| GLS1 (Set 2)                     | 0     | 0.28 | 0.37 | 1.0   | 0.25 | 0.23 | 0.56       |
| GLS1 (Set 3)                     | 0     | 0.09 | 0.16 | 1.0   | 0    | 0    | 1.0        |
| GLS1 (Set 4)                     | 0.15  | 0.12 | 0.19 | 1.0   | 0.18 | 0.12 | 0.45       |
| GLS2 (Set 1)                     | 1.0   | 0.73 | 0.85 | 0.16  | 0.10 | 0.26 | 0.10       |
| GLS2 (Set 2)                     | 1.0   | 0.66 | 0.63 | 0.11  | 0.20 | 0.48 | 0.15       |
| GLS2 (Set 3)                     | 1.0   | 1.5  | 1.7  | 0.41  | .69  | 0.64 | 0.27       |
| GLS2 (Set 4)                     | 1.0   | 0.99 | 1.0  | 0.34  | 0.23 | 0.67 | 0.46       |
| GLUD1 (Set 1)                    | 1.0   | 1.3  | 1.3  | 0.48  | 0.53 | 0.06 | 0.29       |
| GLUD1 (Set 2)                    | 1.0   | 1.1  | 1.4  | 0.28  | 0.68 | 0.46 | 0.52       |
| GLUD1 (Set 3)                    | 1.0   | 0.59 | 0.57 | 0.10  | 0.01 | 0.01 | 0.16       |
| GLUD1 (Set 4)                    | 1.0   | 0.69 | 0.48 | 0.07  | 0.29 | 0.55 | 0.24       |
| GAPDH (Set 1)                    | 1.0   | 1.0  | 0.94 | 1.5   | 1.1  | 1.2  | 0.89       |
| GAPDH (Set 2)                    | 1.0   | 0.92 | 0.93 | 1.1   | 1.0  | 0.94 | 0.76       |
| GAPDH (Set 3)                    | 1.0   | 1.0  | 1.1  | 1.1   | 0.88 | 0.82 | 0.76       |
| GAPDH (Set 4)                    | 1.0   | 1.3  | 1.3  | 0.97  | 1.0  | 1.0  | 1.4        |
| <b>Supplemental Figure 1</b>     |       |      |      |       |      |      |            |
| PCNA (Set 1)                     | 1.0   | 2.5  | 5.7  | 28.8  | 4.7  | 2.4  | 24.5       |
| PCNA (Set 2)                     | 1.0   | 5.7  | 7.6  | 138.7 | 32.3 | 6.6  | 121.6      |
| PCNA (Set 3)                     | 1.0   | 6.5  | 4.7  | 37.4  | 10.6 | 2.1  | 30.2       |
| PCNA (Set 4)                     | 1.0   | 1.2  | 7.2  | 101.8 | 11.2 | 4.3  | 77.4       |
| GAPDH (Set 1)                    | 1.0   | 0.98 | 0.76 | 0.94  | 0.73 | 0.65 | 0.50       |
| GAPDH (Set 2)                    | 1.0   | 0.85 | 0.76 | 0.94  | 0.90 | 0.91 | 1.2        |
| GAPDH (Set 3)                    | 1.0   | 0.70 | 0.63 | 0.59  | 0.54 | 0.60 | 0.55       |
| GAPDH (Set 4)                    | 1.0   | 0.93 | 0.79 | 1.0   | 1.0  | 1.1  | 1.3        |
| <b>Supplemental Figure 2</b>     |       |      |      |       |      |      |            |
| Myc (short exposure, left)       | 0     | 0    | 0    | 1.0   | 0    | 0    | .71        |
| Myc (short exposure, right)      | 0     | 0    | 0    | 1.0   | 0    | 0    | 0.76       |
| $\beta$ -catenin (left)          | 1.0   | 0.73 | 0.84 | 4.7   | 1.5  | 1.0  | 2.5        |
| $\beta$ -catenin (right)         | 1.0   | 2.3  | 1.6  | 2.6   | 8.4  | 6.2  | 1.9        |
| YAP (left)                       | 0     | 0    | 0    | 1.0   | 0    | 0    | 0.54       |
| YAP (right)                      | 0     | 0    | 0    | 1.0   | 0    | 0    | 0.31       |
| GAPDH (A, short exposure, left)  | 1.0   | 0.99 | 0.94 | 0.98  | 0.98 | 0.84 | 0.91       |
| GAPDH (A, short exposure, right) | 1.0   | 1.4  | 1.1  | 1.2   | 1.2  | 1.2  | 1.4        |
| Myc (long exposure, top)         | 1.0   | 2.0  | 5.6  | -     | 0.98 | 1.1  | -          |
| Myc (long exposure, bottom)      | 1.0   | 1.1  | 0.69 | -     | 0.11 | 0.12 | -          |
| GAPDH (A, long exposure)         | 1.0   | 0.84 | 0.73 | -     | 0.80 | 0.84 | -          |
| PDH (left)                       | 1.0   | 0.81 | 0.64 | 0.34  | 0.24 | 0.38 | 0.26       |
| PDH (right)                      | 1.0   | 0.54 | 0.49 | 0.20  | 0.51 | 0.78 | 0.48       |
| pPDH (left)                      | 1.0   | 0.54 | 0.72 | 0.10  | 0.04 | 0.15 | 0.13       |
| pPDH (right)                     | 1.0   | 0.40 | 0.73 | 0.15  | 0.05 | 0.09 | 0.06       |
| PDK1 (left)                      | 1.0   | 0.78 | 0.17 | 0.08  | 0.17 | 0.09 | 0.46       |
| PDK1 (right)                     | 1.0   | 0.49 | 1.2  | 0.85  | 0.44 | 0.50 | 0.97       |
| PDP2 (left)                      | 1.0   | 0.27 | 0.61 | 1.1   | 0.27 | 0.11 | 1.3        |
| PDP2 (right)                     | 1.0   | 0.46 | 0.75 | 1.3   | 1.4  | 1.1  | 1.4        |
| GAPDH (B, left)                  | 1.0   | 1.1  | 1.0  | 0.96  | 1.0  | 1.0  | 0.96       |
| GAPDH (B, right)                 | 1.0   | 1.2  | 1.3  | 1.3   | 0.85 | 1.1  | 1.3        |

**Supplemental Table S6. Western Blot Quantification with ImageJ.** Western blot band densities were quantified with ImageJ and normalized to control liver. If no detectable control liver band was found, values were normalized to either tumor or D3 samples.

## Supplemental References

1. Edmunds, L. R., Otero, P. A., Sharma, L., D'Souza, S., Dolezal, J. M., David, S., Lu, J., Lamm, L., Basantani, M., Zhang, P., Sipula, I. J., Li, L., Zeng, X., Ding, Y., Ding, F., Beck, M. E., Vockley, J., Monga, S. P., Kershaw, E. E., O'Doherty, R. M., Kratz, L. E., Yates, N. A., Goetzman, E. P., Scott, D., Duncan, A. W., and Prochownik, E. V. (2016) Abnormal lipid processing but normal long-term repopulation potential of myc<sup>-/-</sup> hepatocytes. *Oncotarget* **7**, 30379-30395
2. Letts, J. A., Fiedorczuk, K., and Sazanov, L. A. (2016) The architecture of respiratory supercomplexes. *Nature* **537**, 644-648
3. van Gent, D., Sharp, P., Morgan, K., and Kalsheker, N. (2003) Serpins: structure, function and molecular evolution. *The international journal of biochemistry & cell biology* **35**, 1536-1547
